# Supplementary material for: A Moderated Mediation Model of Factors Influencing Intention to Adopt Cryptocurrency among University Students
Source: Hindawi journal article supplement (doi:10.1155/2022/9718920), 2022-02-10
Supplement: f1 [file 9718920.f1.zip]

Archive with 2 entries (2 files):
- Crypto Instrument Table (1).docx
- Supplementary Description_9718920.docx
