# Supplementary material for: A Moderated Mediation Model of Factors Influencing Intention to Adopt Cryptocurrency among University Students
Source: Hindawi journal article supplement (doi:10.1155/2022/9718920), 2022-02-10
Supplement: f1 [file 9718920.f1.zip › Crypto Instrument Table (1).docx]

Table

*Research Instruments*

| Variables | Items | Proxies | Sources |
| --- | --- | --- | --- |
| Perceived Benefits | PB1 | I think that using Cryptocurrency is more secure than traditional currencies. | Adapted from (Walton & Johnston, 2018) |
| PB2 | I think that using Cryptocurrency (over traditional currencies) will cost less. |
| PB3 | I would use Cryptocurrency because it provides me with more anonymity than traditional currencies. |
| Perceived Risks | PR1 | I think it is risky to use cryptocurrencies without any legal framework to back them up | Adopted from (Mendoza-Tello et al., 2019; Chan et al., 2018) |
| PR2 | I think it is dangerous to use cryptocurrencies because they are volatile |
| PR3 | I think it is risky to use cryptocurrencies because of attacks and illegal activities. |
| PR4 | I consider the use of cryptocurrencies risky due to cryptographic failures in electronic devices |
| PR5 | Hackers might take control of my transaction activities if I use Cryptocurrency. |
| Social Effects | SE1 | The people who are important to me will think that I should use cryptocurrencies. | Adopted from (Arias-Oliva et al., 2019) |
| SE2 | The people who inﬂuence me will think that I should use cryptocurrencies. |
| SE3 | People whose opinions I value would like me to use cryptocurrencies. |
| Structural Provisions | SP1 | I have the resources necessary to use cryptocurrencies | Adopted from (Arias-Oliva et al., 2019; Chan et al., 2018) |
| SP2 | I have the knowledge before using cryptocurrencies |
| SP3 | Cryptocurrency is compatible with other technology I use. |
| SP4 | I can get help from others when I have  difficulties using Cryptocurrency. |
| Perceived value from Cryptocurrency | PV1 | Compared to the fee I need to pay, the use of Cryptocurrency offers value for money | Adapted from (Kim et al., 2007) |
| PV2 | Compared to the effort I need to put in, the use of Cryptocurrency is beneficial to me |
| PV3 | Compared to the time I need to spend, the use of Cryptocurrency is worthwhile to me |
| PV4 | Overall, the use of Cryptocurrency delivers me good value |
| Attitude towards Cryptocurrency | AT1 | Using cryptocurrency would be a good idea. | Adopted from (Schaupp & Festa, 2018; Alaeddin & Altounjy, 2018)  Adapted from (Walton & Johnston, 2018) |
| AT2 | I like the idea of using cryptocurrency for conducting financial transactions. |
| AT3 | Using cryptocurrency would be a pleasant experience. |
| AT4 | I think it is very convenient to use Cryptocurrency anytime. |
| AT5 | I think it is very convenient to use Cryptocurrency anywhere. |
| AT6 | In my opinion, it is desirable to use Cryptocurrency as a currency. |
| Personal Innovativeness | PI1 | If I heard about Cryptocurrency, I would look for ways to experiment with it. | Adapted from (Lu et al., 2005; Al-Jabri, 2015; Baabdullah, A., et al., 2015) |
| PI2 | Among my peers, I am usually the first to explore new technologies. |
| PI3 | I like to experiment with new technologies: i.e. Cryptocurrency. |
| PI4 | In general, I am not hesitant to try out new information technologies. |
| PI5 | Compared to my friends, I seek out a lot of information about Cryptocurrency. |
| Self |efficacy | SE1 | I would try the new Cryptocurrency even if, in my circle of friends, nobody has trailed it before. |  |
|  | SE2 | I do not need some people’s help to use Cryptocurrency |  |
|  | SE3 | I have a confidence to use Cryptocurrency |  |
| Behavioral intention to adopt Cryptocurrency | BI1 | I predict that I will use cryptocurrencies | Adopted from (Arias-Oliva et al., 2019; Alaeddin & Altounjy, 2018; Schaupp & Festa, 2018; Mendoza-Tello et al., 2019) |
| BI2 | I intend to periodically use Cryptocurrency |
| BI3 | I want to use the services where can pay by Cryptocurrency |
| BI4 | I want to use Cryptocurrency to pay for my purchases |
| BI5 | I intend to use cryptocurrency at some point in the future. |
